# Supplementary material for: Clinical Pharmacists’ Knowledge of and Attitudes toward Pharmacogenomic Testing in China
Source: MDPI journal article supplement (doi:10.3390/jpm12081348), 2022-08-21
Supplement: s1 [file s1]

# Supplementary Materials

Figure S1. Distribution of province and department. (N=1005)

| Province | Department | Card | Onco | Resp | ICU | Cere/<br>Neur | Pedi | Dige | Surg | Endo | O&G | Neph | Hema | Infe | Psy | Pain | Emer | Rheu | Derm | Others | Total |
|----------|------------|------|------|------|-----|---------------|------|------|------|------|-----|------|------|------|-----|------|------|------|------|--------|-------|
| ZJ       |            | 5    | 14   | 8    | 8   | 7             | 3    | 2    | 2    | 0    | 13  | 2    | 4    | 2    | 0   | 2    | 1    | 1    | 0    | 7      | 81    |
| GX       |            | 9    | 6    | 12   | 6   | 5             | 7    | 8    | 5    | 4    | 2   | 4    | 2    | 2    | 0   | 0    | 0    | 0    | 0    | 7      | 79    |
| HeN      |            | 11   | 7    | 16   | 4   | 5             | 4    | 3    | 0    | 8    | 3   | 2    | 0    | 0    | 1   | 2    | 0    | 0    | 1    | 6      | 73    |
| HLJ      |            | 13   | 9    | 10   | 5   | 9             | 4    | 3    | 3    | 3    | 1   | 0    | 0    | 0    | 1   | 0    | 1    | 0    | 0    | 3      | 65    |
| JS       |            | 5    | 6    | 6    | 7   | 4             | 5    | 3    | 1    | 3    | 5   | 3    | 2    | 2    | 1   | 1    | 0    | 1    | 0    | 4      | 59    |
| SC       |            | 7    | 6    | 3    | 3   | 2             | 3    | 1    | 9    | 2    | 5   | 0    | 1    | 2    | 0   | 0    | 0    | 0    | 0    | 5      | 49    |
| CQ       |            | 5    | 11   | 3    | 3   | 2             | 2    | 1    | 4    | 1    | 4   | 3    | 0    | 0    | 0   | 0    | 1    | 2    | 0    | 4      | 46    |
| GS       |            | 3    | 10   | 7    | 4   | 3             | 0    | 4    | 1    | 1    | 0   | 0    | 1    | 1    | 1   | 0    | 0    | 0    | 0    | 5      | 41    |
| JX       |            | 9    | 3    | 4    | 5   | 2             | 3    | 1    | 1    | 4    | 1   | 1    | 2    | 1    | 1   | 1    | 0    | 0    | 0    | 2      | 41    |
| BJ       |            | 3    | 1    | 4    | 1   | 2             | 5    | 2    | 3    | 0    | 4   | 2    | 1    | 1    | 1   | 1    | 2    | 0    | 0    | 1      | 34    |
| SH       |            | 3    | 3    | 4    | 2   | 3             | 1    | 3    | 0    | 3    | 2   | 0    | 1    | 1    | 6   | 0    | 1    | 0    | 0    | 1      | 34    |
| JL       |            | 8    | 3    | 3    | 4   | 2             | 0    | 2    | 4    | 1    | 0   | 1    | 0    | 0    | 0   | 0    | 0    | 0    | 0    | 2      | 30    |
| S3X      |            | 4    | 3    | 5    | 2   | 1             | 2    | 2    | 1    | 1    | 2   | 1    | 0    | 0    | 0   | 0    | 0    | 1    | 0    | 2      | 27    |
| HuN      |            | 4    | 6    | 1    | 3   | 2             | 1    | 0    | 1    | 1    | 1   | 1    | 1    | 0    | 0   | 1    | 0    | 0    | 0    | 3      | 26    |
| SD       |            | 6    | 4    | 3    | 2   | 2             | 4    | 1    | 1    | 1    | 0   | 0    | 1    | 0    | 0   | 1    | 0    | 0    | 0    | 0      | 26    |
| GZ       |            | 2    | 1    | 5    | 1   | 0             | 3    | 4    | 1    | 1    | 0   | 1    | 1    | 1    | 0   | 0    | 0    | 0    | 0    | 4      | 25    |
| XJ       |            | 3    | 7    | 3    | 2   | 0             | 0    | 0    | 2    | 1    | 0   | 2    | 1    | 1    | 0   | 1    | 0    | 1    | 0    | 1      | 25    |
| HeB      |            | 7    | 3    | 1    | 2   | 1             | 3    | 4    | 0    | 1    | 1   | 0    | 0    | 0    | 0   | 0    | 0    | 0    | 0    | 1      | 24    |
| FJ       |            | 0    | 2    | 1    | 2   | 3             | 1    | 1    | 4    | 2    | 0   | 0    | 0    | 1    | 1   | 1    | 0    | 0    | 0    | 3      | 22    |
| YN       |            | 4    | 4    | 0    | 5   | 1             | 3    | 1    | 0    | 0    | 2   | 2    | 0    | 0    | 0   | 0    | 0    | 0    | 0    | 0      | 22    |
| NMG      |            | 3    | 2    | 3    | 3   | 0             | 1    | 1    | 0    | 4    | 1   | 0    | 1    | 1    | 0   | 0    | 0    | 0    | 0    | 1      | 21    |
| HuB      |            | 2    | 2    | 2    | 2   | 3             | 2    | 0    | 3    | 2    | 0   | 1    | 1    | 0    | 0   | 0    | 0    | 0    | 0    | 0      | 20    |
| AH       |            | 4    | 0    | 4    | 1   | 2             | 2    | 4    | 1    | 0    | 0   | 0    | 0    | 0    | 0   | 0    | 0    | 0    | 0    | 0      | 18    |
| GD       |            | 4    | 2    | 1    | 2   | 3             | 2    | 1    | 1    | 0    | 0   | 0    | 0    | 0    | 0   | 0    | 0    | 1    | 0    | 1      | 18    |
| SIX      |            | 2    | 6    | 1    | 0   | 0             | 2    | 0    | 1    | 1    | 0   | 1    | 1    | 0    | 0   | 1    | 0    | 0    | 0    | 2      | 18    |
| TJ       |            | 1    | 5    | 1    | 2   | 0             | 1    | 3    | 2    | 0    | 0   | 1    | 0    | 1    | 0   | 0    | 0    | 0    | 0    | 1      | 18    |
| LN       |            | 1    | 2    | 4    | 1   | 2             | 0    | 2    | 1    | 1    | 0   | 0    | 1    | 0    | 0   | 0    | 1    | 0    | 0    | 0      | 16    |
| NX       |            | 2    | 1    | 0    | 1   | 2             | 1    | 2    | 1    | 2    | 0   | 0    | 0    | 1    | 0   | 0    | 1    | 0    | 0    | 2      | 16    |
| QH       |            | 3    | 2    | 1    | 1   | 0             | 0    | 2    | 1    | 1    | 0   | 2    | 0    | 2    | 1   | 0    | 0    | 0    | 0    | 0      | 16    |
| HaiN     |            | 3    | 0    | 1    | 1   | 1             | 1    | 1    | 1    | 1    | 0   | 1    | 0    | 0    | 0   | 1    | 1    | 0    | 0    | 1      | 14    |
| XZ       |            | 1    | 0    | 0    | 0   | 0             | 0    | 0    | 0    | 0    | 0   | 0    | 0    | 0    | 0   | 0    | 0    | 0    | 0    | 0      | 1     |
| Total    |            | 137  | 131  | 117  | 85  | 69            | 66   | 62   | 55   | 50   | 47  | 31   | 22   | 20   | 14  | 13   | 9    | 7    | 1    | 69     | 1,005 |

Annotation:

Province: Zhejiang (ZJ), Guangxi (GX), Henan (HeN), Heilongjiang (HLJ), Jiangsu (JS), Sichuan (SC), Chongqing (CQ), Gansu (GS), Jiangxi (JX), Beijing (BJ), Shanghai (SH), Jilin (JL), Shaanxi (S3X), Hunan (HuN), Shandong (SD), Guizhou (GZ), Xinjiang (XJ), Hebei (HeB), Fujian (FJ), Yunan (YN), Neimenggu (NMG), Hubei (HuB), Anhui (AH), Guangdong (GD), Shanxi (S1X), Tianjin (TJ), Liaoning (LN), Ningxia (NX), Qinghai (QH), Hainan (HaiN), Xizang (XZ).

Department: Cardiovascular (Card), Oncology (Onco), Respiratory (Resp), Cerebrovascular/ Neurology (Cere/Neur), Pediatrics (Pedi), Digestion (Dige), Surgery (Surg), Endocrine (Endo), Obstetrics and Gynecology (O&G), Nephrology (Neph), Hematology (Hema), Anti-infectives (Infe), Psychiatry (Psy), Emergency (Emer), Rheumatology (Rheu), Dermatology (Derm).
